RESEARCH ARTICLE

# Small molecule inhibitors of mesotrypsin from a structure-based docking screen

Olumide Kayode<sup>1</sup>, Zunnan Huang<sup>2a</sup>, Alexei S. Soares<sup>3</sup>, Thomas R. Caulfield<sup>4</sup>, Zigang Dong<sup>2</sup>, Ann M. Bode<sup>2</sup>, Evette S. Radisky<sup>1\*</sup>

**1** Department of Cancer Biology, Mayo Clinic Comprehensive Cancer Center, Jacksonville, Florida, United States of America, **2** The Hormel Institute, University of Minnesota, Austin, Minnesota, United States of America, **3** Photon Sciences Directorate, Brookhaven National Laboratory, Upton, New York, United States of America, **4** Department of Neuroscience, Mayo Clinic College of Medicine, Jacksonville, Florida, United States of America

✉ Current address: Guangdong Provincial Key Laboratory of Medical Molecular Diagnostics, Dongguan Scientific Research Center, Guangdong Medical University, Dongguan, China

\* [radisky.evette@mayo.edu](mailto:radisky.evette@mayo.edu)

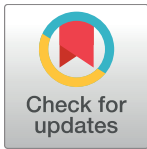

**OPEN ACCESS**

**Citation:** Kayode O, Huang Z, Soares AS, Caulfield TR, Dong Z, Bode AM, et al. (2017) Small molecule inhibitors of mesotrypsin from a structure-based docking screen. PLoS ONE 12(5): e0176694. <https://doi.org/10.1371/journal.pone.0176694>

**Editor:** Matthew Bogyo, Stanford University, UNITED STATES

**Received:** February 21, 2017

**Accepted:** April 16, 2017

**Published:** May 2, 2017

**Copyright:** © 2017 Kayode et al. This is an open access article distributed under the terms of the [Creative Commons Attribution License](https://creativecommons.org/licenses/by/4.0/), which permits unrestricted use, distribution, and reproduction in any medium, provided the original author and source are credited.

**Data Availability Statement:** The coordinates and structure factors of the reported x-ray structure have been submitted to the Worldwide Protein Data Bank under the accession code 5TP0. Other relevant data are within the paper and its Supporting Information files.

**Funding:** This work was supported by United States National Institutes of Health grant R01CA154387 to E.S.R. Diffraction data were measured at beamline X25 of the National Synchrotron Light Source, which is supported by the Offices of Biological and Environmental

## Abstract

*PRSS3*/mesotrypsin is an atypical isoform of trypsin, the upregulation of which has been implicated in promoting tumor progression. To date there are no mesotrypsin-selective pharmacological inhibitors which could serve as tools for deciphering the pathological role of this enzyme, and could potentially form the basis for novel therapeutic strategies targeting mesotrypsin. A virtual screen of the Natural Product Database (NPD) and Food and Drug Administration (FDA) approved Drug Database was conducted by high-throughput molecular docking utilizing crystal structures of mesotrypsin. Twelve high-scoring compounds were selected for testing based on lowest free energy docking scores, interaction with key mesotrypsin active site residues, and commercial availability. Diminazene (CID22956468), along with two similar compounds presenting the bis-benzamidine substructure, was validated as a competitive inhibitor of mesotrypsin and other human trypsin isoforms. Diminazene is the most potent small molecule inhibitor of mesotrypsin reported to date with an inhibitory constant ( $K_i$ ) of  $3.6 \pm 0.3 \mu\text{M}$ . Diminazene was subsequently co-crystallized with mesotrypsin and the crystal structure was solved and refined to 1.25 Å resolution. This high resolution crystal structure can now offer a foundation for structure-guided efforts to develop novel and potentially more selective mesotrypsin inhibitors based on similar molecular substructures.

## Introduction

*PRSS3*/Mesotrypsin is one of three tryptic digestive enzymes produced and secreted from the human pancreas. Unlike other trypsin isoforms, it possesses resistance to proteinaceous trypsin inhibitors [1–3]. Additionally, mesotrypsin displays differential activity from the other two human trypsin isoforms, displaying reduced capability for activating pancreatic zymogens [3], reduced activation of protease activated receptors (PARs) [4, 5], and elevated proteolytic activity towards proteinaceous trypsin inhibitors [3, 6–10]. Mesotrypsin represents a minor

Research and of Basic Energy Sciences of the United States Department of Energy, and the National Center for Research Resources of the National Institutes of Health. The funders had no role in study design, data collection and analysis, decision to publish, or preparation of the manuscript.

**Competing interests:** The authors have declared that no competing interests exist.

constituent of pancreatic secretions, and is hypothesized to be important in the digestion of trypsin inhibitors from the diet [3]. *PRSS3* expression outside of the digestive tract has also been described; for example, splice isoform gene products of *PRSS3* known as trypsinogen 4 and 5 are found in the brain and epidermis [10–12]. Tissue specific expression of these isoforms is driven from distinct promoters, while the active forms of these proteases are of identical sequence to pancreatic mesotrypsin. In the skin, mesotrypsin has been found to contribute to epidermal barrier permeability formation, keratinocyte terminal differentiation, and epidermal desquamation [12–14] while no function has yet been attributed to the high levels expressed in the brain.

Mesotrypsin expression has been observed in a number of different cancers including non-small cell lung cancer (NSCLC) [15], breast [16], esophageal [17], pancreatic [18], prostate [19], and ovarian cancers [20]. Elevated *PRSS3*/mesotrypsin expression is associated with poor prognosis in NSCLC, pancreatic, prostate, and ovarian cancers [15, 18–20]. In prostate cancer this overexpression is associated with a metastatic phenotype, which is recapitulated in culture models and mouse xenograft studies [19]. Studies with cell and animal models have likewise functionally implicated mesotrypsin as a contributor to progression and metastasis of pancreatic cancer [18]. Upregulation of mesotrypsin in endothelial cells is associated with cell migration and angiogenic stimulation by degradation of tissue factor pathway inhibitor-2 (TFPI-2) [9]. This and other data taken together advocate that targeting mesotrypsin may represent an effective therapeutic strategy for intervening in cancer progression and metastasis.

Trypsin family members share high sequence identity and homology making selective targeting a challenge. Our group has previously employed structure-based and directed evolution protein engineering efforts focused on modifying natural serine protease inhibitors to identify stabilizing mutations which would confer improved affinity towards mesotrypsin while also slowing the rate of proteolysis [21–23]. Another study used the phage display technique to identify small peptide inhibitors of mesotrypsin [24]. However, peptide and protein-based therapeutics face difficulties during drug development due to challenges including poor cellular uptake, poor solubility and pharmacokinetics, and issues relating to immunogenicity, storage, stability, and formulation [25]. These are areas in which small molecule therapeutics can offer advantages over peptide or protein-based drugs. Efforts to develop mesotrypsin small molecule inhibitors have been limited to one study by Karle and associates [26], in which the compounds had high  $IC_{50}$  values (upper micromolar to millimolar range), potentially limiting their utility.

To identify better small molecule inhibitors, here we describe a structure guided effort utilizing virtual screening to identify compounds with predicted activity towards mesotrypsin. Three compounds displaying inhibitory activity towards mesotrypsin were identified, and evaluated for selectivity among human trypsin isoforms. Additionally, we report a 1.25 Å crystal structure of the top candidate in complex with mesotrypsin, which we anticipate can serve as a springboard for further future development of mesotrypsin selective compounds.

## Results and discussion

### Molecular docking identifies candidate molecules with prospective mesotrypsin inhibitory activity

An ensemble docking-based virtual screening [27] of compounds from the FDA and NPD databases was conducted using three crystal structures of mesotrypsin (PDB IDs: 3P92 [22], 3P95 [22], and 1H4W [2]). Positive hits were chosen based on low docking scores to mesotrypsin and crucial hydrogen bond interactions observed with mesotrypsin binding pocket residues such as Asp-189, Ser-190, Gln-192, Arg-193, and Gly-216 [22]. The docking scores were

formulated on the “extra-precision” XP Glide software algorithm which considers factors such as: lipophilicity, displacement of water, hydrogen bonding and electrostatic interactions, and metal ion/ligand interactions as favorable interactions, while the desolvation of polar or charged groups, restriction of motion, and the entropic cost of binding adversely affect docking score [28, 29]. Twenty-eight top compounds were computationally predicted to exhibit activity towards mesotrypsin based on the virtual screening; details of selection criteria are described in Materials and Methods.

### Virtual screening and experimental validation identify bis-benzamidine compounds with mesotrypsin inhibitory activity

From the twenty-eight top compounds identified in the virtual screen, twelve compounds were found to be readily commercially available and were therefore procured and evaluated for inhibitory activity towards mesotrypsin (Fig 1, S1 Table). Compounds were tested by an *in vitro* activity assay utilizing the colorimetric peptide reporter substrate N-Cbz-Gly-Pro-Arg-pNA. The assay monitors the rate of para-nitroaniline production after substrate cleavage by mesotrypsin. Of the twelve compounds tested, ten displayed no inhibitory activity towards

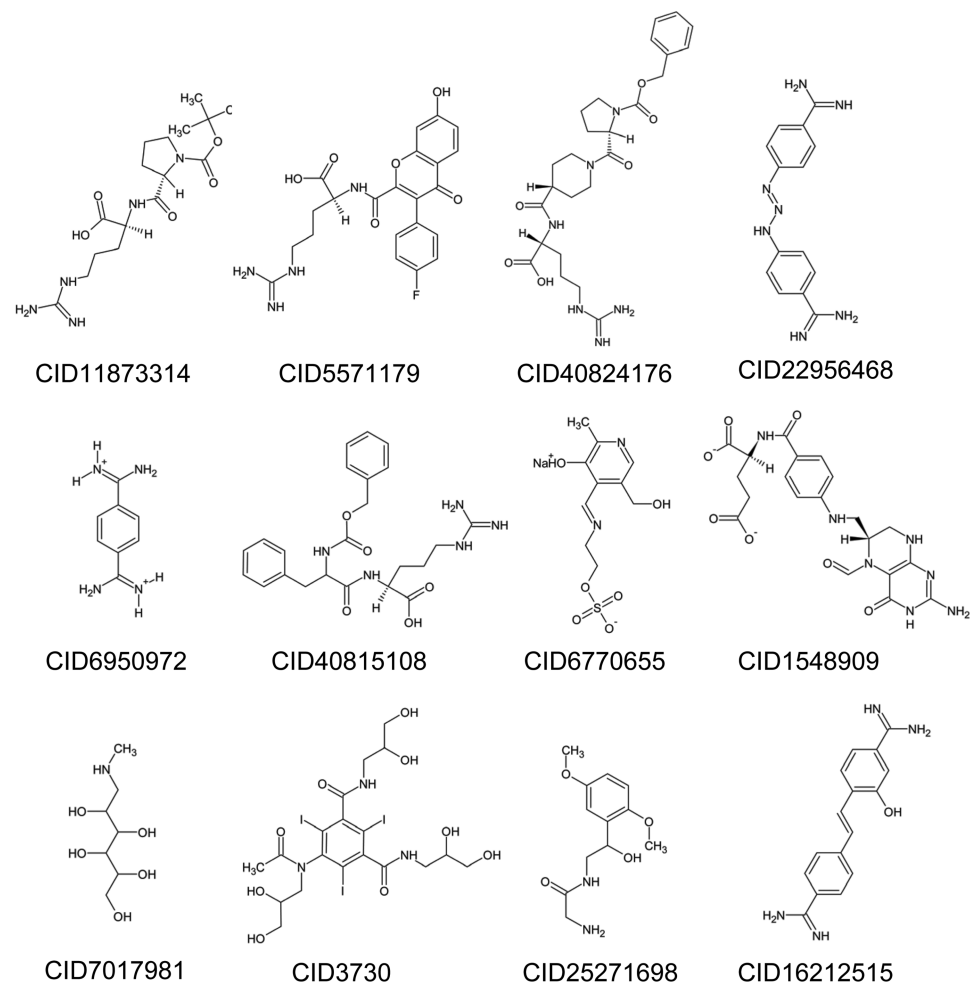

**Fig 1. Commercially available compounds from virtual screen of FDA and NPD databases.**

<https://doi.org/10.1371/journal.pone.0176694.g001>

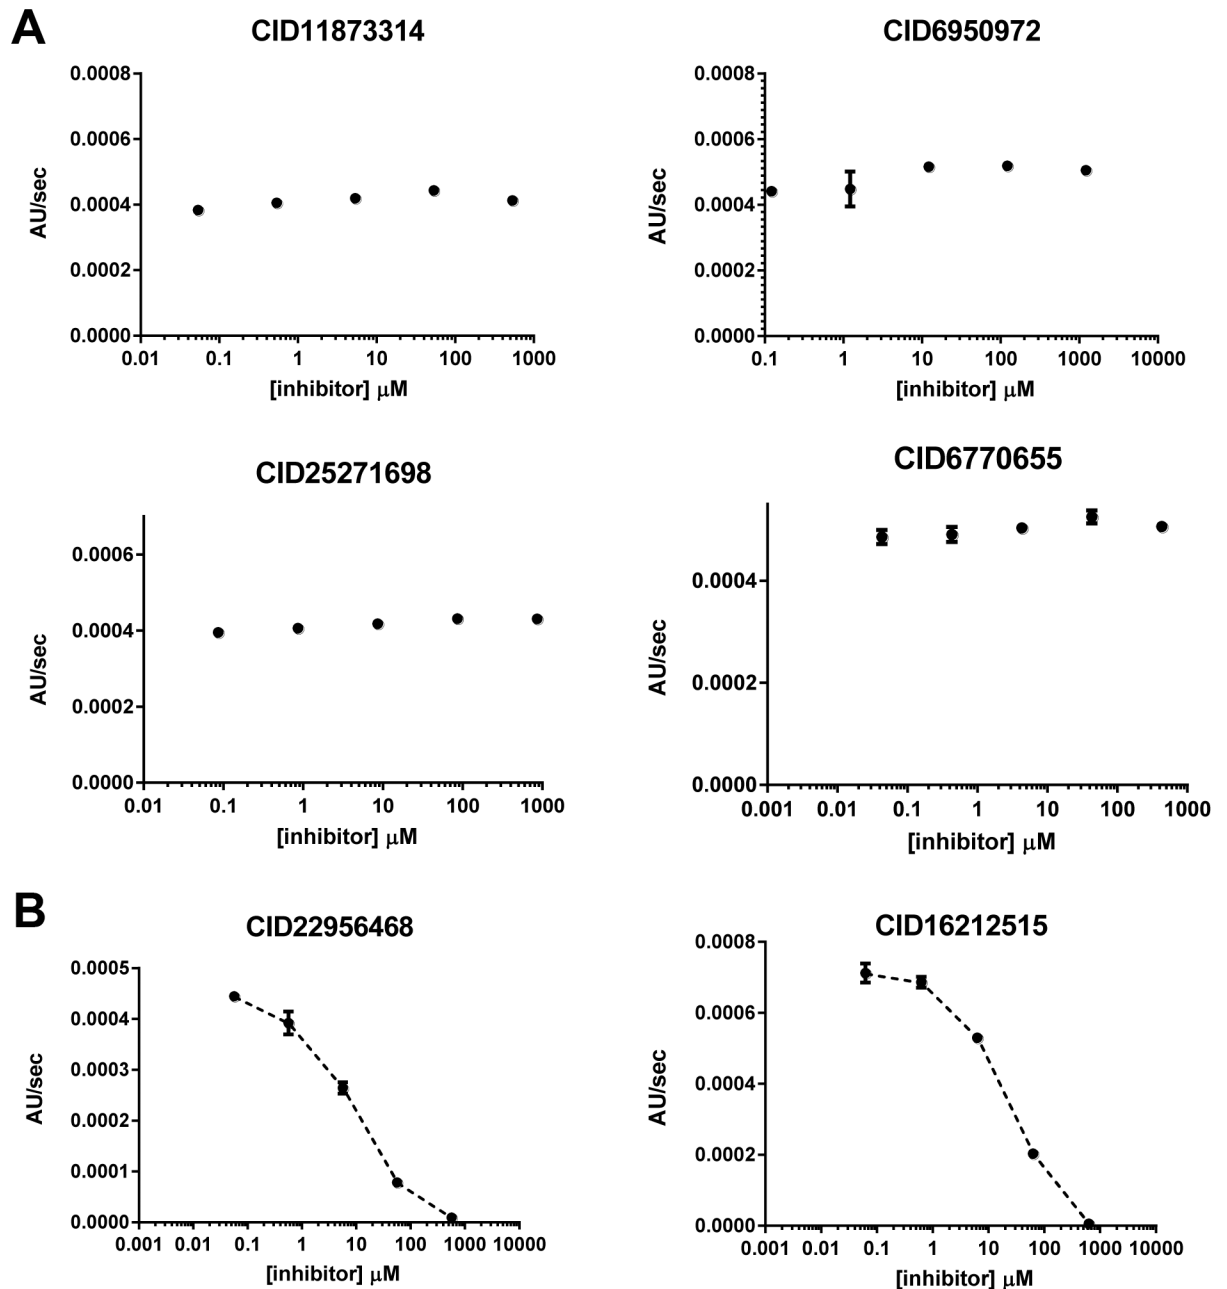

**Fig 2. Mesotrypsin inhibitory activity of select compounds from virtual screening effort.** A) Log-Linear plots from the activity assay for representative compounds that showed no activity towards mesotrypsin. B) Log-Linear plots of mesotrypsin inhibition by compounds CID22956468 and CID16212515, subsequently identified as diminazene and hydroxystilbamidine, respectively.

<https://doi.org/10.1371/journal.pone.0176694.g002>

mesotrypsin into the low millimolar range. Conversely, two compounds, diminazene (CID 22956468) and hydroxystilbamidine (CID 16212515) exhibited inhibitory activity towards mesotrypsin in the low micromolar range (Fig 2A and 2B).

The two inhibitory compounds are structurally similar bis-benzamidine analogs differing in the composition of the linker region. Although our virtual screen had not employed any prior knowledge about trypsin inhibitory compounds, a literature search of these compounds

revealed that diminazene and pentamidine, another bis-benzamidine analog, are both trypanocidal drugs with known inhibitory activity towards trypanosome serine oligopeptidase [30], while also displaying activity against bovine trypsin [30, 31]. Upon obtaining pentamidine, we assayed the three bis-benzamidine compounds against mesotrypsin over multiple substrate and compound concentrations to determine the inhibition mode: competitive, non-competitive, or mixed inhibition. All three compounds exhibited a competitive inhibition mode of binding toward mesotrypsin (shown for diminazene in Fig 3), with inhibition constants ( $K_i$ ) of 3.66, 5.10, and 10.57  $\mu\text{M}$  for diminazene, pentamidine, and hydroxystilbamidine respectively (Fig 4).

To assess compound selectivity we determined  $K_i$  for the three compounds towards related human trypsin isoforms trypsin 1 (cationic trypsin) and trypsin 2 (anionic trypsin). All three compounds displayed the tightest affinity for anionic trypsin, slightly reduced affinity for cationic trypsin, but presented marginal selectivity among these two isoforms. Diminazene bound to mesotrypsin most tightly while also being the least selective for the other trypsin isoforms (Fig 4), and was in turn selected as the best candidate compound for further investigation based on this profile.

### High resolution crystal structure of diminazene in complex with mesotrypsin

We set out to crystallize diminazene with mesotrypsin to gain a structural view of this candidate compound bound within the mesotrypsin active site. Protein crystals were grown at room temperature, harvested, and cryoprotected prior to data collection. Data were collected from one crystal which diffracted to 1.25  $\text{\AA}$  resolution. The diminazene-mesotrypsin complex crystallized in the  $P2_12_12_1$  space group having the unit cell dimensions of  $a = 40.92$ ,  $b = 64.44$ ,  $c = 80.68$  and  $\alpha\beta\gamma = 90^\circ$  (Table 1). The structure was solved using molecular replacement.

Following refinement, well defined density was observed for the first benzamidine moiety of diminazene, which was observed to bind within the specificity pocket of mesotrypsin (Fig 5). Trypsins cleave after basic residues lysine and arginine, and use the charge complementarity of the specificity pocket to recognize their substrates. This interaction and specificity is mediated by Asp-189 which lies at the base of the pocket and forms salt bridge interactions with the  $\epsilon$ -amino or guanidinium group of the substrate residue. In the present structure, nitrogen atoms NAA and NAC of diminazene display hydrogen bonding contacts with Asp-189 of the specificity pocket. The positioning of diminazene in the specificity pocket closely recapitulates the position predicted for the ligand by the docking screen, with a ligand RMSD of 0.614  $\text{\AA}$  (Fig 6A). The second benzamidine moiety of the diminazene molecule exhibited diffuse density, which may be attributable to exposure to the solvent channel, permitting multiple ligand conformations (Fig 5). We anticipate the conformational disorder observed in diminazene could arise in part from cis-to-trans isomerization of the triazene linker [32, 33]. Diminazene has been previously observed as two distinct conformational isomers bound to bovine trypsin in PDB IDs: 3GY2, 3GY6 (Fig 6B) [31].

### Molecular docking predicts potential diminazene interaction with distinctive mesotrypsin Arg-193 residue

Mesotrypsin differs from other human trypsin family members at twenty-eight residues; Arg-193 is one of the most critical because it is located within the active site, at a position where almost all other trypsin and chymotrypsin family serine protease members possess a highly conserved glycine residue. This critical residue is a major contributor to mesotrypsin's

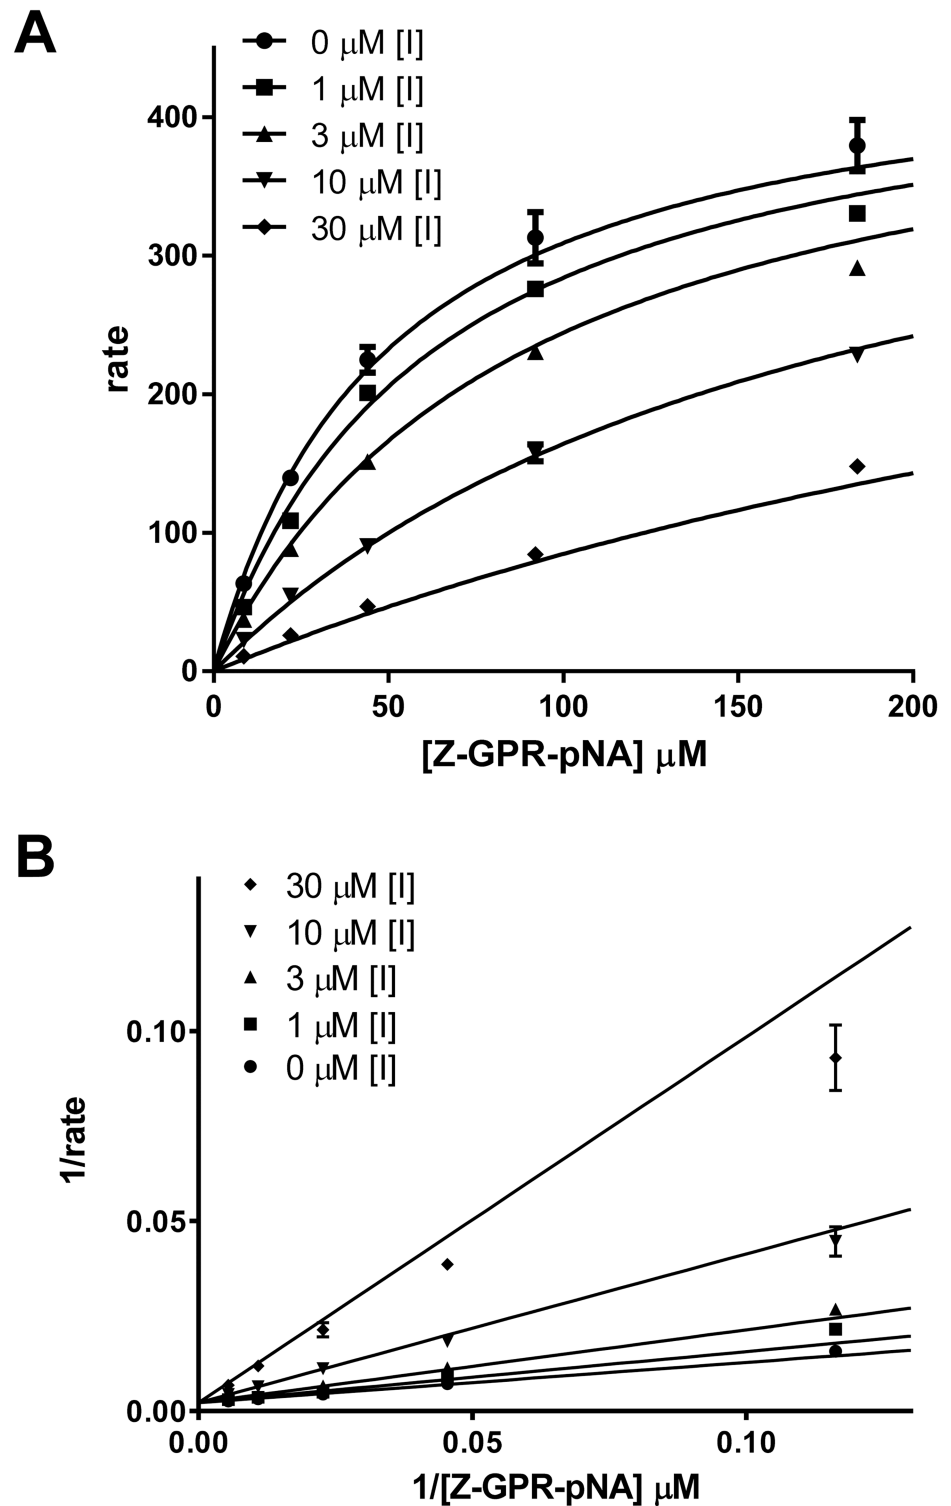

**Fig 3. Diminazene (CID 22956468) is a competitive inhibitor of mesotrypsin.** A) Global fit for the competitive inhibition equation to inhibition data and B) Lineweaver-Burk transform reveal competitive mode of inhibition for diminazene as evidenced by convergence of the Lineweaver-Burk plot on the y-axis. Results are representative of duplicate independent experiments.

<https://doi.org/10.1371/journal.pone.0176694.g003>

| Name                | Compound structure                                                                 | Mesotrypsin $K_i$ ( $\mu\text{M}$ ) | Anionic trypsin $K_i$ ( $\mu\text{M}$ ) | Cationic trypsin $K_i$ ( $\mu\text{M}$ ) |
|---------------------|------------------------------------------------------------------------------------|-------------------------------------|-----------------------------------------|------------------------------------------|
| Diminazene          | 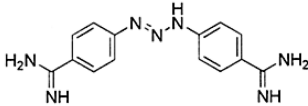  | $3.66 \pm 0.08$                     | $2.29 \pm 0.21$                         | $3.44 \pm 0.41$                          |
| Pentamidine         |   | $5.10 \pm 0.12$                     | $1.06 \pm 0.01$                         | $3.12 \pm 0.60$                          |
| Hydroxystilbamidine |   | $10.57 \pm 1.34$                    | $1.70 \pm 0.05$                         | $3.35 \pm 0.35$                          |
| Benzamidine         |  | $22^\dagger$                        | nd                                      | nd                                       |

**Fig 4. Structural comparison and selectivity of validated mesotrypsin inhibitors.** <sup>†</sup>Benzamidine inhibition constant versus trypsin IV (mesotrypsin) is as reported in [2].

<https://doi.org/10.1371/journal.pone.0176694.g004>

resistance to inhibition and enhanced proteolytic activity towards protein protease inhibitors [2, 3, 6, 34]. Although our high resolution crystal structure revealed the second benzamidine ring of diminazene to be poorly ordered within the mesotrypsin active site, the top ranking binding pose of this molecule from the virtual screen presented a conformational isomer with diminazene interaction at Arg-193 (Fig 6). We hypothesize that future compound optimizations may enhance the interaction with this distinctive active site residue, producing small molecule inhibitors with improved selectivity toward mesotrypsin versus other trypsins and related proteases. Derivatization efforts may include rigidifying the compound scaffold, maximizing stability of conformers that contact Arg-193, and evaluating substitutions of the amidine moiety to optimize polar and electrostatic interactions at the Arg-193 guanidinium moiety. Scaffold “rigidification” is a known approach to improve potency and specificity of compounds toward macromolecular targets [35–38], which given the conformational disorder found in the diminazene co-crystal structure with mesotrypsin, is likely beneficial.

## Conclusions

Mesotrypsin has been identified as a facilitator of cancer progression thereby suggesting mesotrypsin could represent a druggable target, but currently no small molecule inhibitors

**Table 1. X-ray data collection and crystal refinement statistics.**

| mesotrypsin-diminazene                |                                               |
|---------------------------------------|-----------------------------------------------|
| PDB code                              | 5TP0                                          |
| <i>Data collection</i>                |                                               |
| Space group                           | P2 <sub>1</sub> 2 <sub>1</sub> 2 <sub>1</sub> |
| Cell dimensions                       |                                               |
| <i>a</i> , <i>b</i> , <i>c</i> (Å)    | 40.92, 64.44, 80.68                           |
| $\alpha$ , $\beta$ , $\gamma$ (°)     | 90, 90, 90                                    |
| Resolution (Å)                        | 50–1.25 (1.27–1.25)                           |
| R <sub>merge</sub>                    | 0.045 (0.222)                                 |
| R <sub>meas</sub>                     | 0.047 (0.250)                                 |
| R <sub>p.i.m</sub>                    | 0.013 (0.112)                                 |
| CC1/2                                 | ND (0.954)                                    |
| I/ $\sigma$ I                         | 52.1 (5.1)                                    |
| Completeness (%)                      | 98.4 (82.3)                                   |
| Redundancy                            | 11.1 (4.5)                                    |
| <i>Refinement</i>                     |                                               |
| Resolution (Å)                        | 50–1.25                                       |
| No. reflections                       | 55799                                         |
| R <sub>work</sub> / R <sub>free</sub> | 11.8 / 13.7                                   |
| No. atoms                             |                                               |
| Protein                               | 1772                                          |
| Ligand/ion                            | 42 (1 CA, 4 SO4, 1 DRG)                       |
| Water                                 | 226                                           |
| B-factors                             |                                               |
| Protein                               | 12                                            |
| Ligand/ion                            | 18                                            |
| Water                                 | 27                                            |
| Ramachandran statistics               |                                               |
| Favored (%)                           | 99                                            |
| Allowed (%)                           | 1                                             |
| Outliers (%)                          | 0                                             |
| R.m.s deviations                      |                                               |
| Bond lengths (Å)                      | 0.0252                                        |
| Bond angles (°)                       | 2.17                                          |

Values from highest resolution shell are shown in parentheses.  
 ND, CC1/2 for full dataset was not reported by HKL-2000.

<https://doi.org/10.1371/journal.pone.0176694.t001>

demonstrate enough discrimination between trypsin family members. Mesotrypsin displays unique active site features and conformational dynamics [34] which can in turn influence substrate motions [39]. Diminazene, a bis-benzamidine analog with mesotrypsin inhibitory activity, presents an attractive starting point for the development of more selective mesotrypsin inhibitors. This new high resolution crystal structure of mesotrypsin complexed with diminazene could help facilitate derivatization efforts, addressing current pan-inhibition of human trypsins through rigidification of diminazene to select for a conformation that maximizes interactions with the non-conserved Arg-193 residue.



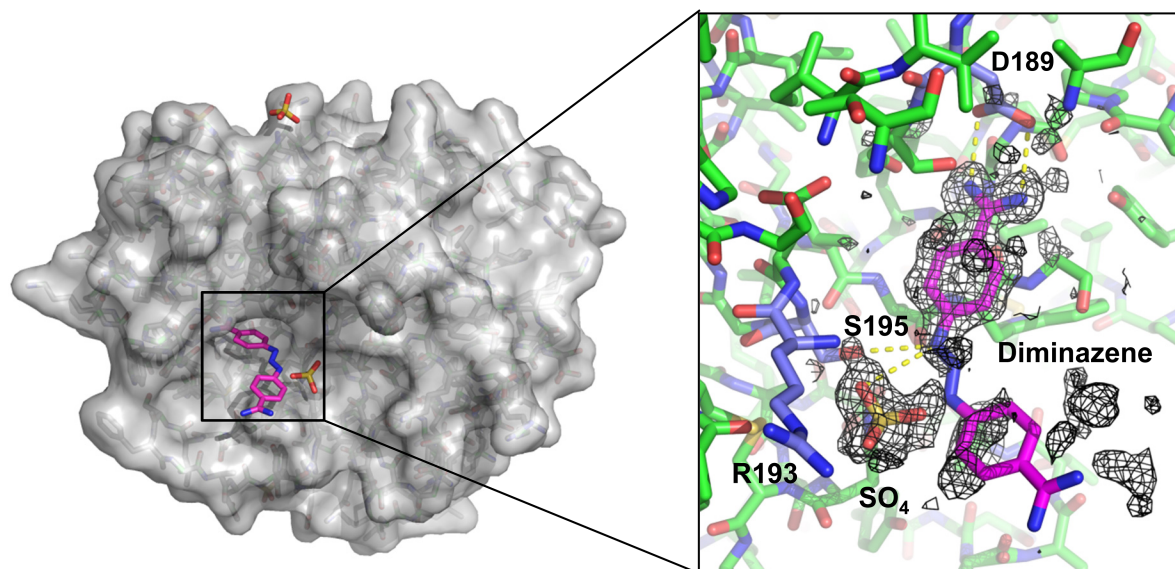

**Fig 5. Crystal structure of mesotrypsin in complex with diminazene.** Mesotrypsin Arg-193 is shown with carbon atoms in periwinkle, other mesotrypsin residue carbons are in green, and diminazene is shown with carbon atoms in magenta. Omit difference map contoured at  $2.0\sigma$  shown in the right panel displays well-defined electron density for the upper benzamidine group bound within the specificity pocket. The remainder of the molecule, unmodelled in the deposited coordinate file, is disordered as portrayed by the diffuse density around the lower benzamidine moiety, revealing that the drug is able to adopt multiple conformations within the solvent channel.

<https://doi.org/10.1371/journal.pone.0176694.g005>

## Materials and methods

### Virtual screening using Glide

The crystal structures of mesotrypsin (PDB IDs: 3P92 [22], 3P95 [22], and 1H4W [2]) were downloaded from the Protein Data Bank [40]. The three mesotrypsin structures were further converted into all-atom, fully prepared receptor model structures by using the Protein Preparation Wizard module in Maestro (Maestro version 9.2, Schrödinger, LLC). Default settings were used, except that bovine pancreatic trypsin inhibitor (BPTI) variants were cut to leave only the Arg-15 ligand residue in 3P92 and 3P95 structures. Next, the docking receptor grid was created using the Receptor Grid Generation feature (Glide version 5.7, Schrödinger, LLC). The grid boxes and centers were generated using default settings by identifying the mesotrypsin ligands BPTI Arg-15 (for 3P92 and 3P95) and BEN (for 1H4W). Meanwhile, the FDA and NPD Databases were downloaded from the ZINC database (<http://zinc11.docking.org/vendor/>) and further processed by using Schrödinger's LigPrep (LigPrep, version 2.5, Schrödinger, LLC).

We used the Virtual Screening Workflow (VSW) in Schrödinger to run the docking screening of FDA and NPD databases targeted to an ensemble of three receptor grids (3P92, 3P95 and 1H4W). In the VSW procedure, the docking of the compounds in a database into each receptor grid was hierarchically performed using the Glide program (Glide version 5.7, Schrödinger, LLC) through three accuracy levels: HTVS, SP (Standard Precision) [28] and XP (Extra Precision)-docking [29] in successive steps. The screening processes outputted six rank lists of compound leads, each list corresponding to the screening of one database to one receptor grid. Docked poses of all compounds with docking scores  $< -10.0$  kcal/mol versus one or more receptor grid using the XP algorithm were visually examined for hydrogen bond interactions

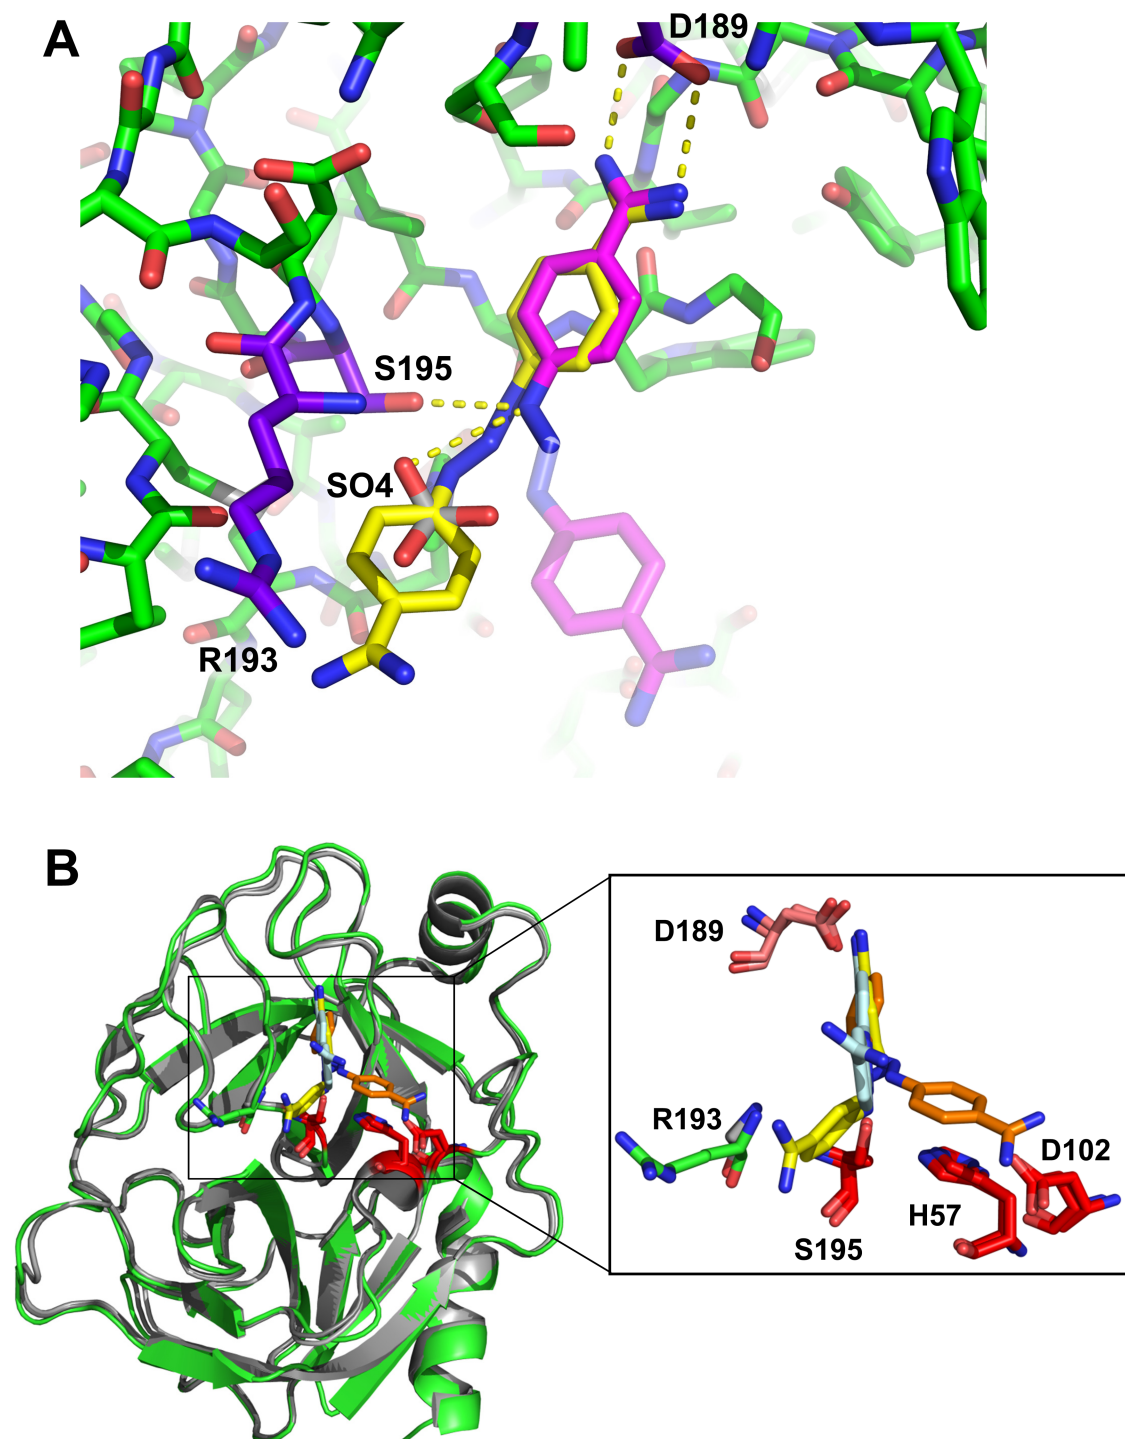

**Fig 6. Conformational isomers of diminazene within the trypsin active site. A)** Structural overlay of the top diminazene docking pose (yellow) and crystallographic structure (Mesotrypsin, green; Arg-193, purple; diminazene, magenta) show good correlation between the predicted and observed ligand positioning in the mesotrypsin specificity pocket, with a ligand RMSD of 0.614 Å. Atoms of the second benzamidine moiety lacking defined density in the crystal structure are represented as transparent sticks, and were not used in the RMSD calculation. **B)** A structural overlay of the mesotrypsin-diminazene docking pose (mesotrypsin, green; diminazene, yellow) with bovine trypsin (gray) in complex with diminazene (orange, cyan) from entries 3GY2 and 3GY6 [31] highlights the multiple diminazene binding conformations possible within the trypsin active site. Catalytic triad residues are shown in red, specificity pocket residue Asp-189 in salmon, and mesotrypsin Arg-193 shown in green.

<https://doi.org/10.1371/journal.pone.0176694.g006>

observed with mesotrypsin binding pocket residues including Asp-189, Ser-190, Gln-192, Arg-193, and Gly-216. Twenty-eight of the compounds showed four or more direct hydrogen bonds with the enzyme, and thus were selected for a final list representing all of the hits with XP docking scores lower than -10 kcal/mol versus one or more of the three receptor grids, and also possessing four or more hydrogen bonds with mesotrypsin. Among these 28 compounds, 12 were found to be readily commercially available and thus were procured for experimental validation.

## Protein expression and purification

Recombinant human anionic trypsinogen, human cationic trypsinogen and human mesotrypsinogen were expressed in *E. coli*, extracted from inclusion bodies, refolded, purified and activated with bovine enteropeptidase as described in previous work [6, 22].

## Compounds

Milligram quantities of each compound were requested or procured from commercial sources. Diminazene (CID 22956468), pentamidine (CID 4735), hydroxystilbamidine (CID 16212515), and CID 6950972 were received from the National Cancer Institute Developmental Therapeutics Program (NCI-DTP) (Rockville, MD). CID 3730 and 25271698 were purchased from Prestwick Chemical (San Diego, CA), and CIDs 11873314, 5571179, 40824176, 40815108, 6770655, 1548909, 7017981 were purchased from InterBioScreen Ltd (Russia)

## Mesotrypsin activity and competitive inhibition assays

Active mesotrypsin was quantified by active site titration as described in [21] using 4-nitrophenyl-4-guanidinobenzoate (NPGb) from Sigma. Concentrations of colorimetric peptide reporter substrate N-Cbz-Gly-Pro-Arg-pNA (Sigma) for the activity and competitive inhibition assay were determined by end point assay. Working stocks for compounds were diluted in dimethylsulfoxide (DMSO) and stored at -20°C. Compounds were assessed for mesotrypsin inhibitory activity in reactions carried out in cuvettes at 37°C in a Varian Cary-100 spectrophotometer. Reactions consisted of 0.25 nM enzyme, 100 μM reporter substrate, 100 mM Tris-HCl pH 8.0, 1 mM CaCl<sub>2</sub>, and a compound concentration range between 50 nM to 500 μM in the assay. Reactions were followed for approximately three minutes, with the initial rates determined by the linear increase in absorbance resulting from para-nitroaniline production ( $\epsilon_{410} = 8480 \text{ M}^{-1} \text{ cm}^{-1}$ ). Absorbance versus compound concentration was plotted on a Linear-Log scale to determine IC<sub>50</sub>.

The competitive inhibition assay reactions consisted of 0.25 nM enzyme, five reporter substrate concentrations between 10 μM-200 μM, and five inhibitory compound concentrations between 1–30 μM. Reactions were followed for approximately 3 minutes, and the initial rate data were globally fitted using Prism (GraphPad Software, San Diego CA) by non-linear regression based on Eq 1. Results are from duplicate independent experiments.

$$V = \frac{K_{\text{cat}}[E]_0[S]}{K_m \left(1 + \frac{[I]}{K_i}\right) + [S]} \quad (1)$$

## Protein crystallization

Mesotrypsin was mixed with 1 mM diminazene at a total protein concentration of 4 mg/mL. Protein complex solution was mixed 1:1 (v/v) with reservoir solution, and crystallized via the

hanging drop method over a reservoir solution containing 2 M ammonium sulfate, 0.1 M HEPES pH 7.5, and 2% PEG-400 at room temperature. Crystals were harvested, cryoprotected, and flash cooled in liquid N<sub>2</sub>. X-ray diffraction data were collected at beamline X25 at the National Synchrotron Light Source, Brookhaven National Laboratory. Data were collected at 100 K from one crystal that diffracted to 1.25 Å. Data were merged and scaled with HKL-2000 [41]. The crystal belonged to the space group P2<sub>1</sub>2<sub>1</sub>2<sub>1</sub>, with unit cell dimensions a = 40.92, b = 64.44, c = 80.68,  $\alpha\beta\gamma = 90^\circ$ , and contained 1 copy of the complex in the asymmetric unit. The structure was solved by molecular replacement using MOLREP in CCP4 [42], using as the search model the complex of benzamidine with mesotrypsin (also known as brain trypsin IV; PDB ID 1H4W). Refinement employed alternating cycles of manual rebuilding in WinCOOT [43, 44] and automated refinement using REFMAC5 [45]. The final stage of refinement included addition of solvent molecules into peaks greater than 1 $\sigma$  and within acceptable hydrogen bonding distance from neighboring protein atoms. The quality of the final models was analyzed using wwPDB validation tools [46]. The coordinates and structure factors have been submitted to the Worldwide Protein Data Bank under the accession code 5TP0. Structure figures were generated using PyMOL version 1.7.4 (Schrodinger, LLC).

## Supporting information

**S1 Table. Structures and docking scores of 12 compounds tested from the FDA and NPD databases.**

(PDF)

## Acknowledgments

This work was supported by United States National Institutes of Health grant R01CA154387 to E.S.R. Diffraction data were measured at beamline X25 of the National Synchrotron Light Source, which is supported by the Offices of Biological and Environmental Research and of Basic Energy Sciences of the United States Department of Energy, and the National Center for Research Resources of the National Institutes of Health.

## Author Contributions

**Conceptualization:** OK ZH ZD AMB ESR.

**Formal analysis:** OK ZH ASS TRC.

**Funding acquisition:** ESR.

**Investigation:** OK ZH ASS TRC.

**Project administration:** AMB ESR.

**Supervision:** ZD AMB ESR.

**Visualization:** OK ESR.

**Writing – original draft:** OK ZH ESR.

**Writing – review & editing:** OK ZH TRC ESR.

## References

1. Rinderknecht H, Renner IG, Abramson SB, Carmack C. Mesotrypsin: A new inhibitor-resistant protease from a zymogen in human pancreatic tissue and fluid. *Gastroenterology*. 1984; 86: 681–692. PMID: [6698368](#)
2. Katona G, Berglund GI, Hajdu J, Graf L, Szilagyi L. Crystal structure reveals basis for the inhibitor resistance of human brain trypsin. *J Mol Biol*. 2002; 315: 1209–1218. <https://doi.org/10.1006/jmbi.2001.5305> PMID: [11827488](#)
3. Szmola R, Kukor Z, Sahin-Toth M. Human mesotrypsin is a unique digestive protease specialized for the degradation of trypsin inhibitors. *J Biol Chem*. 2003; 278: 48580–48589. <https://doi.org/10.1074/jbc.M310301200> PMID: [14507909](#)
4. Grishina Z, Ostrowska E, Halangk W, Sahin-Toth M, Reiser G. Activity of recombinant trypsin isoforms on human proteinase-activated receptors (par): Mesotrypsin cannot activate epithelial par-1, -2, but weakly activates brain par-1. *Br J Pharmacol*. 2005; 146: 990–999. <https://doi.org/10.1038/sj.bjp.0706410> PMID: [16231009](#)
5. Knecht W, Cottrell GS, Amadesi S, Mohlin J, Skaregarde A, Gedda K, et al. Trypsin IV or mesotrypsin and p23 cleave protease-activated receptors 1 and 2 to induce inflammation and hyperalgesia. *J Biol Chem*. 2007; 282: 26089–26100. <https://doi.org/10.1074/jbc.M703840200> PMID: [17623652](#)
6. Salameh MA, Soares AS, Hockla A, Radisky ES. Structural basis for accelerated cleavage of bovine pancreatic trypsin inhibitor (bpti) by human mesotrypsin. *J Biol Chem*. 2008; 283: 4115–4123. <https://doi.org/10.1074/jbc.M708268200> PMID: [18077447](#)
7. Salameh MA, Robinson JL, Navaneetham D, Sinha D, Madden BJ, Walsh PN, et al. The amyloid precursor protein/protease nexin 2 kunitz inhibitor domain is a highly specific substrate of mesotrypsin. *J Biol Chem*. 2010; 285: 1939–1949. <https://doi.org/10.1074/jbc.M109.057216> PMID: [19920152](#)
8. Pendlebury D, Wang R, Henin RD, Hockla A, Soares AS, Madden BJ, et al. Sequence and conformational specificity in substrate recognition: Several human kunitz protease inhibitor domains are specific substrates of mesotrypsin. *J Biol Chem*. 2014; 289: 32783–32797. <https://doi.org/10.1074/jbc.M114.609560> PMID: [25301953](#)
9. Ghilardi C, Silini A, Figini S, Anastasia A, Lupi M, Fruscio R, et al. Trypsinogen 4 boosts tumor endothelial cells migration through proteolysis of tissue factor pathway inhibitor-2. *Oncotarget*. 2015; 6: 28389–28400. <https://doi.org/10.18632/oncotarget.4949> PMID: [26318044](#)
10. Miyai M, Matsumoto Y, Yamanishi H, Yamamoto-Tanaka M, Tsuboi R, Hibino T. Keratinocyte-specific mesotrypsin contributes to the desquamation process via kallikrein activation and lekti degradation. *J Invest Dermatol*. 2014; 134: 1665–1674. <https://doi.org/10.1038/jid.2014.3> PMID: [24390132](#)
11. Nemeth AL, Medveczky P, Toth J, Siklodi E, Schlett K, Patthy A, et al. Unconventional translation initiation of human trypsinogen 4 at a cug codon with an n-terminal leucine. A possible means to regulate gene expression. *Febs J*. 2007; 274: 1610–1620. <https://doi.org/10.1111/j.1742-4658.2007.05708.x> PMID: [17480209](#)
12. Nakanishi J, Yamamoto M, Koyama J, Sato J, Hibino T. Keratinocytes synthesize enteropeptidase and multiple forms of trypsinogen during terminal differentiation. *J Invest Dermatol*. 2010; 130: 944–952. <https://doi.org/10.1038/jid.2009.364> PMID: [19924134](#)
13. Yamamoto-Tanaka M, Makino T, Motoyama A, Miyai M, Tsuboi R, Hibino T. Multiple pathways are involved in DNA degradation during keratinocyte terminal differentiation. *Cell Death Dis*. 2014; 5: e1181. <https://doi.org/10.1038/cddis.2014.145> PMID: [24743736](#)
14. Yamamoto-Tanaka M, Motoyama A, Miyai M, Matsunaga Y, Matsuda J, Tsuboi R, et al. Mesotrypsin and caspase-14 participate in prosaposin processing: Potential relevance to epidermal permeability barrier formation. *J Biol Chem*. 2014; 289: 20026–20038. <https://doi.org/10.1074/jbc.M113.543421> PMID: [24872419](#)
15. Diederichs S, Bulk E, Steffen B, Ji P, Tickenbrock L, Lang K, et al. S100 family members and trypsinogens are predictors of distant metastasis and survival in early-stage non-small cell lung cancer. *Cancer Res*. 2004; 64: 5564–5569. <https://doi.org/10.1158/0008-5472.CAN-04-2004> PMID: [15313892](#)
16. Hockla A, Radisky DC, Radisky ES. Mesotrypsin promotes malignant growth of breast cancer cells through shedding of cd109. *Breast Cancer Res Treat*. 2010; 124: 27–38. <https://doi.org/10.1007/s10549-009-0699-0> PMID: [20035377](#)
17. Han S, Lee CW, Trevino JG, Hughes SJ, Sarosi GA Jr. Autocrine extra-pancreatic trypsin 3 secretion promotes cell proliferation and survival in esophageal adenocarcinoma. *PLoS One*. 2013; 8: e76667. <https://doi.org/10.1371/journal.pone.0076667> PMID: [24146905](#)
18. Jiang G, Cao F, Ren G, Gao D, Bhakta V, Zhang Y, et al. Prss3 promotes tumour growth and metastasis of human pancreatic cancer. *Gut*. 2010; 59: 1535–1544. <https://doi.org/10.1136/gut.2009.200105> PMID: [20947888](#)

19. Hockla A, Miller E, Salameh MA, Copland JA, Radisky DC, Radisky ES. PRSS3/mesotrypsin is a therapeutic target for metastatic prostate cancer. *Mol Cancer Res*. 2012; 10: 1555–1566. <https://doi.org/10.1158/1541-7786.MCR-12-0314> PMID: 23258495
20. Ma R, Ye X, Cheng H, Ma Y, Cui H, Chang X. Prss3 expression is associated with tumor progression and poor prognosis in epithelial ovarian cancer. *Gynecol Oncol*. 2015; 137: 546–552. <https://doi.org/10.1016/j.ygyno.2015.02.022> PMID: 25735255
21. Salameh MA, Soares AS, Navaneetham D, Sinha D, Walsh PN, Radisky ES. Determinants of affinity and proteolytic stability in interactions of kunitz family protease inhibitors with mesotrypsin. *J Biol Chem*. 2010; 285: 36884–36896. <https://doi.org/10.1074/jbc.M110.171348> PMID: 20861008
22. Salameh MA. The p2' residue is a key determinant of mesotrypsin specificity: Engineering a high-affinity inhibitor with anticancer activity. *Biochem J*. 2011; 440: 95–105. <https://doi.org/10.1042/BJ20110788> PMID: 21806544
23. Cohen I, Kayode O, Hockla A, Sankaran B, Radisky DC, Radisky ES, et al. Combinatorial protein engineering of proteolytically resistant mesotrypsin inhibitors as candidates for cancer therapy. *Biochem J*. 2016; 473: 1329–1341. <https://doi.org/10.1042/BJ20151410> PMID: 26957636
24. Wu P, Weisell J, Pakkala M, Perakyla M, Zhu L, Koistinen R, et al. Identification of novel peptide inhibitors for human trypsins. *Biol Chem*. 2010; 391: 283–293. <https://doi.org/10.1515/BC.2010.030> PMID: 20128688
25. Craik DJ, Fairlie DP, Liras S, Price D. The future of peptide-based drugs. *Chem Biol Drug Des*. 2013; 81: 136–147. <https://doi.org/10.1111/cbdd.12055> PMID: 23253135
26. Karle M, Knecht W, Xue Y. Discovery of benzothiazole guanidines as novel inhibitors of thrombin and trypsin iv. *Bioorg Med Chem Lett*. 2012; 22: 4839–4843. <https://doi.org/10.1016/j.bmcl.2012.05.046> PMID: 22726924
27. Lorber DM, Shoichet BK. Flexible ligand docking using conformational ensembles. *Protein Sci*. 1998; 7: 938–950. <https://doi.org/10.1002/pro.5560070411> PMID: 9568900
28. Friesner RA, Banks JL, Murphy RB, Halgren TA, Klicic JJ, Mainz DT, et al. Glide: A new approach for rapid, accurate docking and scoring. 1. Method and assessment of docking accuracy. *J Med Chem*. 2004; 47: 1739–1749. <https://doi.org/10.1021/jm0306430> PMID: 15027865
29. Friesner RA, Murphy RB, Repasky MP, Frye LL, Greenwood JR, Halgren TA, et al. Extra precision glide: Docking and scoring incorporating a model of hydrophobic enclosure for protein-ligand complexes. *J Med Chem*. 2006; 49: 6177–6196. <https://doi.org/10.1021/jm051256o> PMID: 17034125
30. Morty RE, Troeberg L, Pike RN, Jones R, Nickel P, Lonsdale-Eccles JD, et al. A trypanosome oligopeptidase as a target for the trypanocidal agents pentamidine, diminazene and suramin. *FEBS Lett*. 1998; 433: 251–256. PMID: 9744805
31. Perilo CS, Pereira MT, Santoro MM, Nagem RA. Structural binding evidence of the trypanocidal drugs berenil and pentacarinate active principles to a serine protease model. *Int J Biol Macromol*. 2010; 46: 502–511. <https://doi.org/10.1016/j.ijbiomac.2010.03.006> PMID: 20356563
32. Dugave C, Demange L. Cis-trans isomerization of organic molecules and biomolecules: Implications and applications. *Chem Rev*. 2003; 103: 2475–2532. <https://doi.org/10.1021/cr0104375> PMID: 12848578
33. Barra M, Chen N. Kinetic studies on the thermal cis-trans isomerization of 1, 3-diphenyltriazene in aqueous solution. Effects of acids and bases. *The Journal of organic chemistry*. 2000; 65: 5739–5744. PMID: 10970318
34. Alloy AP, Kayode O, Wang R, Hockla A, Soares AS, Radisky ES. Mesotrypsin has evolved four unique residues to cleave trypsin inhibitors as substrates. *J Biol Chem*. 2015; 290: 21523–21535. <https://doi.org/10.1074/jbc.M115.662429> PMID: 26175157
35. Chowdhury S, Chafeev M, Liu S, Sun J, Raina V, Chui R, et al. Discovery of xen907, a spirooxindole blocker of nav1.7 for the treatment of pain. *Bioorg Med Chem Lett*. 2011; 21: 3676–3681. <https://doi.org/10.1016/j.bmcl.2011.04.088> PMID: 21570288
36. LaPlante SR, Bos M, Brochu C, Chabot C, Coulombe R, Gillard JR, et al. Conformation-based restrictions and scaffold replacements in the design of hepatitis c virus polymerase inhibitors: Discovery of deleobuvir (bi 207127). *J Med Chem*. 2014; 57: 1845–1854. <https://doi.org/10.1021/jm4011862> PMID: 24159919
37. LaPlante SR, Nar H, Lemke CT, Jakalian A, Aubry N, Kawai SH. Ligand bioactive conformation plays a critical role in the design of drugs that target the hepatitis c virus ns3 protease. *J Med Chem*. 2014; 57: 1777–1789. <https://doi.org/10.1021/jm401338c> PMID: 24144444
38. Mahalingam P, Takroui K, Chen T, Sahoo R, Papadopoulos E, Chen L, et al. Synthesis of rigidified eif4e/eif4g inhibitor-1 (4egi-1) mimetic and their in vitro characterization as inhibitors of protein-protein interaction. *J Med Chem*. 2014; 57: 5094–5111. <https://doi.org/10.1021/jm401733v> PMID: 24827861

39. Kayode O, Wang R, Pendlebury DF, Cohen I, Henin RD, Hockla A, et al. An acrobatic substrate metamorphosis reveals a requirement for substrate conformational dynamics in trypsin proteolysis. *J Biol Chem.* 2016; 291: 26304–26319. <https://doi.org/10.1074/jbc.M116.758417> PMID: 27810896
40. Berman HM, Westbrook J, Feng Z, Gilliland G, Bhat TN, Weissig H, et al. The protein data bank. *Nucleic Acids Res.* 2000; 28: 235–242. PMID: 10592235
41. Otwinowski Z, and Minor W. Processing of x-ray diffraction data collected in oscillation mode. *Methods in Enzymology, Volume 276: Macromolecular Crystallography, part A*, p 307–326, 1997, Carter CW Jr & Sweet RM, Eds., 1997; 276: 307–326.
42. Vagin A, Teplyakov A. Molecular replacement with molrep. *Acta Crystallogr D Biol Crystallogr.* 2010; 66: 22–25. <https://doi.org/10.1107/S0907444909042589> PMID: 20057045
43. Emsley P, Cowtan K. Coot: Model-building tools for molecular graphics. *Acta Crystallogr D Biol Crystallogr.* 2004; 60: 2126–2132. <https://doi.org/10.1107/S0907444904019158> PMID: 15572765
44. Emsley P, Lohkamp B, Scott WG, Cowtan K. Features and development of coot. *Acta Crystallogr D Biol Crystallogr.* 2010; 66: 486–501. <https://doi.org/10.1107/S0907444910007493> PMID: 20383002
45. Murshudov GN, Vagin AA, Dodson EJ. Refinement of macromolecular structures by the maximum-likelihood method. *Acta Crystallogr D Biol Crystallogr.* 1997; 53: 240–255. <https://doi.org/10.1107/S0907444996012255> PMID: 15299926
46. Read RJ, Adams PD, Arendall WB 3rd, Brunger AT, Emsley P, Joosten RP, et al. A new generation of crystallographic validation tools for the protein data bank. *Structure.* 2011; 19: 1395–1412. <https://doi.org/10.1016/j.str.2011.08.006> PMID: 22000512
